# Supplementary material for: Human iPSC-derived spinal neurons carrying the ALS FUS (P525L) mutation exhibit lower response to inhibitory neurotransmitters
Source: Research Square preprint supplement (doi:10.21203/rs.3.rs-7759662/v1), 2025-11-04
Supplement: Supplementary file 1 [file 7001584eef8aaf94ae72a25e.docx]

***Human iPSC-derived spinal neurons carrying the ALS FUS (P525L) mutation exhibit lower response to inhibitory neurotransmitters***

Tiziano D’Andrea1, Maria Cristina Benedetti2,3, Valeria de Turris3, Alessandro Rosa2,3, Sergio Fucile1,4

1IRCCS Neuromed, Pozzilli (Is), Italy

2Department of Biology and Biotechnologies “Charles Darwin”, Sapienza University of Rome, Rome, Italy.

3Center for Life Nano- & Neuro-Science, Fondazione Istituto Italiano di Tecnologia (IIT), Rome, Italy.

4Department of Physiology and Pharmacology, Sapienza University of Rome, Rome, Italy.

***Molecular Neurobiology***

Corresponding author email: t.dandrea@uniroma1.it

**Supplementary Figure legends:**

**Fig. S1 FUS (P525L) mutation causes similar functional alterations in a different hiPSCs cell line.**

A, Amplitude (from threshold to peak) of APs evoked from WT (grey) and FUS (P525L) neurons (white) at DiV 21 (*: r = 5.968, p = 0.013). B, GABA current densities measured from WT and FUS (P525L) neurons at DiV. 21. C, glycine current densities measured from WT and FUS (P525L) neurons at DiV 21 (*: r = 11.518, p < 0.001). D, glutamate current densities measured from WT and FUS (P525L) neurons at DiV 21 (*: r = 8.782, p = 0.001). Data were obtained from iPSC-derived spinal neurons of the T 12.9 cell line, n WT = 18, n FUS(P525L) = 16. Significance was determined using a one-way ANOVA and attested on a a p value *p* < 0.05.

*Figure S1:*
